# Supplementary material for: The lipid composition of isolated cytoplasmic lipid droplets from a human cancer cell line, BE(2)M17
Source: Royal Society of Chemistry journal article supplement (doi:10.1039/c2mb05485j), 2012-04-20
Supplement: c2mb05485j.pdf [file c2mb05485j.pdf]

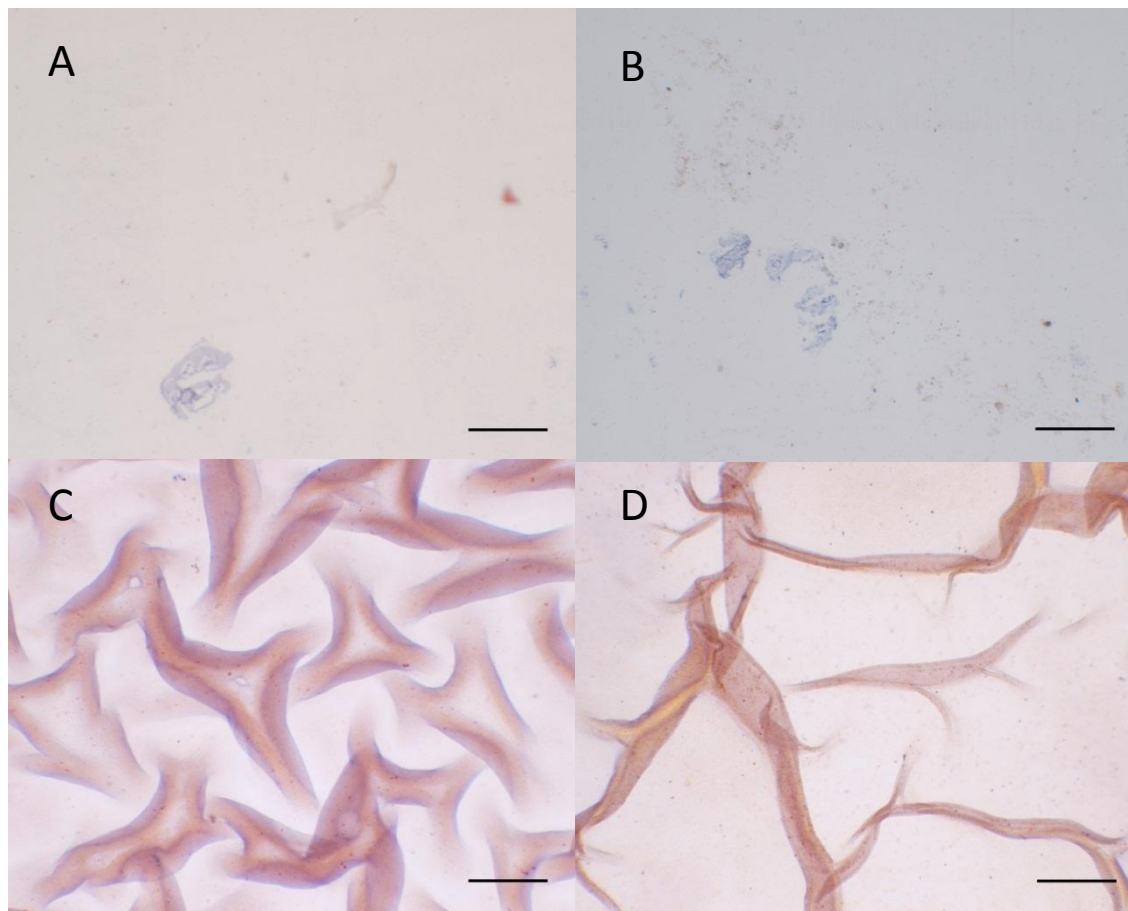

Figure S1 Oil red O and haematoxylin staining of different fractions after isolation. Isolated fraction containing LDs (A), middle sucrose zone (B) and pellet (C) after the gradient ultracentrifuge (142,000xg) to isolate the LDs. The upper fraction (D) after the first centrifuge (2000xg) to briefly spin down the cell nuclei and large cell debris. Bars represent 50 $\mu$ m.

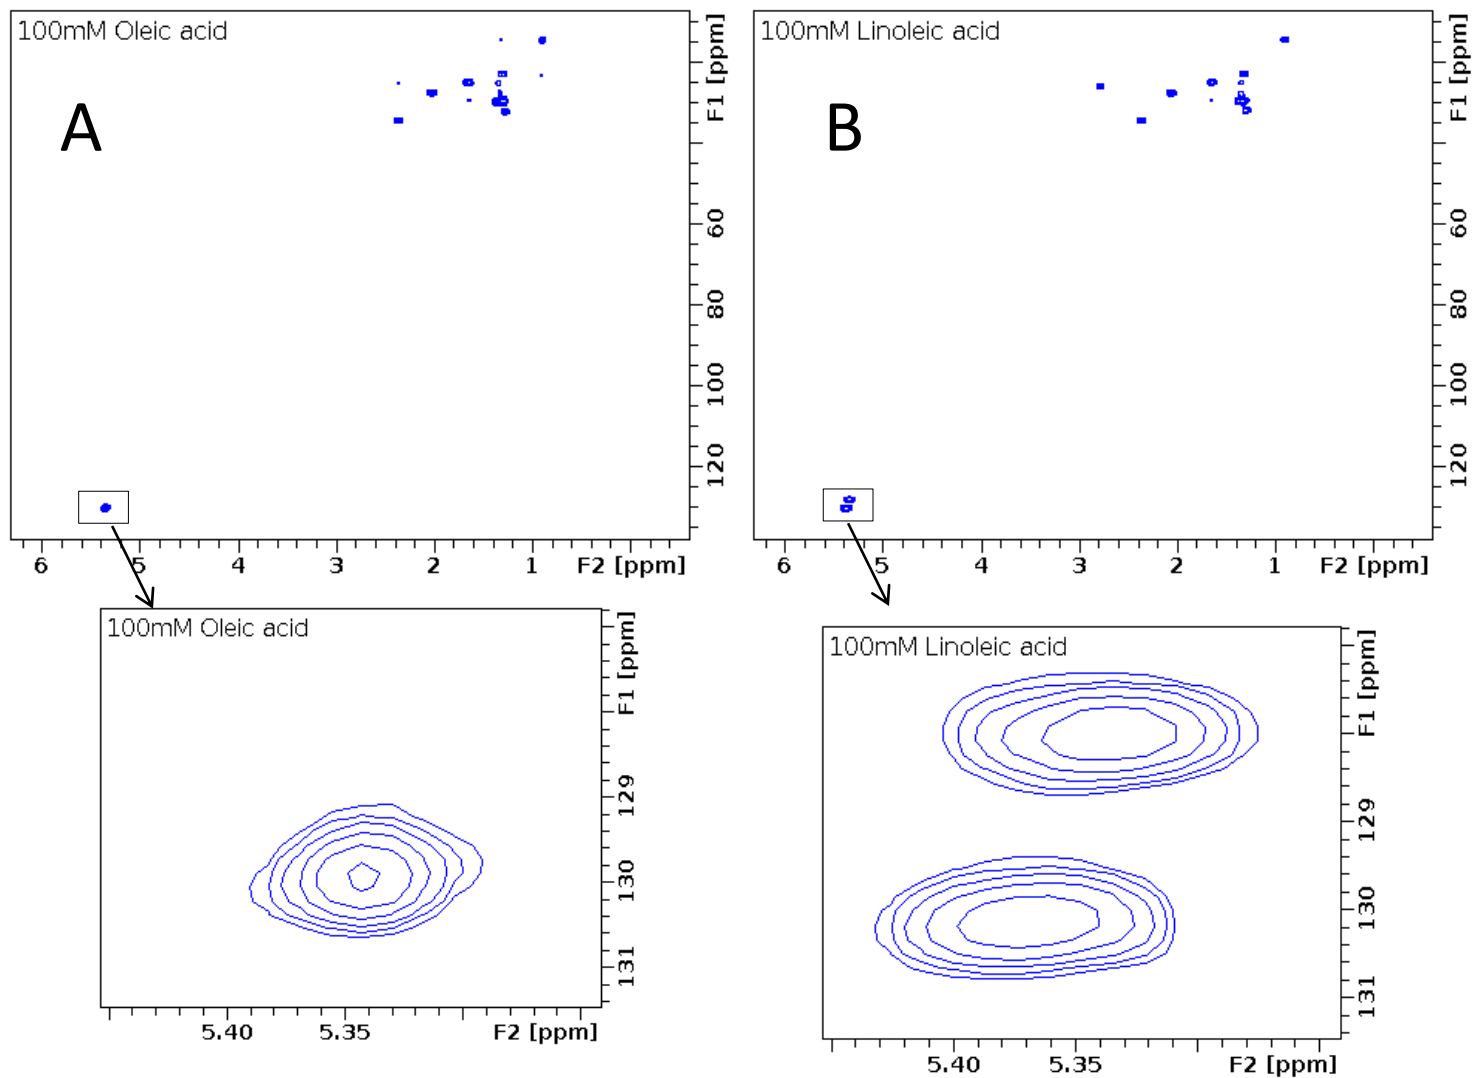

Figure S2 The whole spectra and 5.45-5.25ppm region of HSQC spectra of A: 100mM Oleic acid and B:100mM Linoleic acid
